# Supplementary material
Source: PubMed Central journal article supplement (PMC6692821)
Supplement: bm9b00104_si_001.pdf [file bm9b00104_si_001.pdf]

Supporting Information

# **Alendronate-Functionalized Poly(2-oxazoline)s with Tunable Affinity for Calcium Cations**

*María J. Sánchez-Fernández,<sup>†,‡</sup> Mikey R. Immers,<sup>†</sup> Rosa P. Félix Lanao,<sup>†</sup> Yang Fang,<sup>‡</sup> Johan C. M. E. Bender,<sup>§</sup> Jasmin Mecinović,<sup>†,#</sup> Sander C. G. Leeuwenburgh,<sup>\*,‡,⊥</sup> and Jan C. M. van Hest<sup>\*,†,||,⊥</sup>*

<sup>†</sup>Department of Bio-Organic Chemistry, Institute for Molecules and Materials, Radboud University, 6525 AJ Nijmegen, the Netherlands

<sup>‡</sup>Department of Regenerative Biomaterials, Radboudumc, 6525 EX Nijmegen, the Netherlands

<sup>§</sup>GATT Technologies BV, 6525 ED Nijmegen, the Netherlands

<sup>||</sup>Department of Bio-Organic Chemistry, Institute for Complex Molecular Systems, Eindhoven University of Technology, 5600 MB 10 Eindhoven, the Netherlands

## S1. Procedures for the Synthesis of Alendronate-Functionalized Poly(2-oxazoline)s.

### Polymerization: Synthesis of Methyl Ester-Functionalized Polymers P1a–P5a

#### P(EtOx<sub>90</sub>-MestOx<sub>10</sub>) P1a

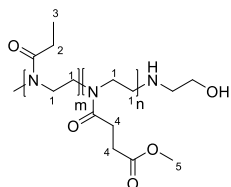

According to the general procedure described in the experimental section, polymerization was conducted using methyl tosylate (0.68 mL, 4.52 mmol), 2-ethyl-2-oxazoline (41.04 mL, 406.59 mmol) and 2-methoxycarbonyl ethyl-2-oxazoline (6.23 mL, 45.18 mmol) in dry MeCN (68 mL, 4 M). The polymerization was terminated by the addition of 2-ethanolamine (2.72 mL, 45.18 mmol) affording the desired polymer **P1a** (52.12 g, 4.39 mmol). **<sup>1</sup>H NMR** [400 MHz,  $\delta$  (ppm), CDCl<sub>3</sub>]: 3.63 (br, 3 H, 5-CH<sub>3</sub>), 3.65–3.35 (br, 8 H, 1-CH<sub>2</sub>), 2.70–2.50 (br, 4 H, 4-CH<sub>2</sub>), 2.50–2.20 (br, 2 H, 2-CH<sub>2</sub>), 0.95–1.15 (br, 3 H, 3-CH<sub>3</sub>). Experimentally determined comonomer ratio: *m/n* 90:10. **SEC**: *M<sub>n</sub>* 10.6 kDa, *D* 1.11. **MALDI-TOF MS**: *M<sub>n</sub>* 9.7 kDa. **Yield**: 97%.

#### P(EtOx<sub>80</sub>-MestOx<sub>20</sub>) P2a

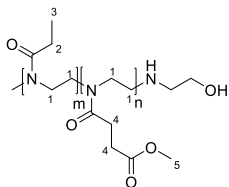

According to the general procedure described in the experimental section, the reaction of a solution of methyl tosylate (0.46 mL, 3.01 mmol), 2-ethyl-2-oxazoline (24.32 mL, 240.94 mmol) and 2-methoxycarbonyl ethyl-2-oxazoline (8.31 mL, 60.24 mmol) in dry MeCN (43 mL, 4 M), terminated by the addition of 2-ethanolamine (1.82 mL, 30.12 mmol) afforded the desired polymer **P2a** (36.22 g, 2.93 mmol). **<sup>1</sup>H NMR** [400 MHz,  $\delta$  (ppm), CDCl<sub>3</sub>]: 3.65 (br, 3 H, 5-CH<sub>3</sub>), 3.65–3.35 (br, 8 H, 1-CH<sub>2</sub>), 2.75–2.50 (br, 4 H, 4-CH<sub>2</sub>), 2.50–2.20 (br, 2 H, 2-CH<sub>2</sub>), 0.95–1.15 (br, 3 H, 3-CH<sub>3</sub>). Experimentally determined comonomer ratio: *m/n* 80:20. **SEC**: *M<sub>n</sub>* 9.6 kDa, *D* 1.17. **MALDI-TOF MS**: *M<sub>n</sub>* 9.8 kDa. **Yield**: 97%.

#### P(EtOx<sub>70</sub>-MestOx<sub>30</sub>) P3a

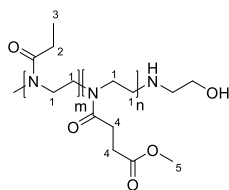

According to the general procedure described in the experimental section, the reaction of a solution of methyl tosylate (0.68 mL, 4.52 mmol), 2-ethyl-2-oxazoline (31.92 mL, 316.23 mmol) and 2-methoxycarbonyl-ethyl-2-oxazoline (18.68 mL, 135.53 mmol) in dry MeCN (63 mL, 4 M), terminated by the addition of 2-ethanolamine (2.72 mL, 45.18 mmol) afforded the desired polymer **P3a** (55.78 g, 4.40 mmol). **<sup>1</sup>H NMR** [400 MHz,  $\delta$  (ppm), CDCl<sub>3</sub>]: 3.65 (br, 3 H, 5-CH<sub>3</sub>), 3.70–3.35 (br, 8 H, 1-CH<sub>2</sub>), 2.70–2.50 (br, 4 H, 4-CH<sub>2</sub>), 2.50–2.20 (br, 2 H, 2-CH<sub>2</sub>), 0.95–1.15 (br, 3 H, 3-CH<sub>3</sub>). Experimentally determined comonomer ratio: *m/n* 70:30. **SEC**: *M<sub>n</sub>* 10.6 kDa, *D* 1.11. **MALDI-TOF MS**: *M<sub>n</sub>* 10.6 kDa. **Yield**: 98%.

#### P(PropOx<sub>90</sub>-MestOx<sub>10</sub>) P4a

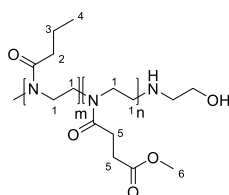

According to the general procedure described in the experimental section, the reaction of a solution of methyl tosylate (0.57 mL, 3.76 mmol), *n*-propyl-2-oxazoline (37.59 mL, 338.82 mmol) and 2-methoxycarbonyl-ethyl-2-oxazoline (5.19 mL, 37.65 mmol) in dry MeCN (52 mL, 4 M), terminated by the addition of 2-ethanolamine (2.72 mL, 37.65 mmol) afforded the desired polymer **P4a** (42.08 g, 3.55 mmol). **<sup>1</sup>H NMR** [400 MHz,  $\delta$  (ppm), CDCl<sub>3</sub>]: 3.65 (br, 3 H, 6-CH<sub>3</sub>), 3.65–3.35 (br, 8 H, 1-CH<sub>2</sub>), 2.70–2.50 (br, 4 H, 5-CH<sub>2</sub>), 2.40–2.10 (br, 2 H, 2-CH<sub>2</sub>), 1.70–1.50 (br, 2 H, 3-CH<sub>2</sub>), 1.00–0.80 (br, 3 H, 4-CH<sub>3</sub>). Experimentally determined comonomer ratio: *m/n* 90:10. **SEC**: *M<sub>n</sub>* 10.2 kDa, *D* 1.08. **MALDI-TOF MS**: *M<sub>n</sub>* 10.4 kDa. **Yield**: 94%.

#### P(PropOx<sub>70</sub>-MestOx<sub>30</sub>) P5a

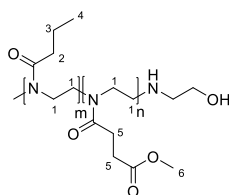

According to the general procedure described in the experimental section, the reaction of a solution of methyl tosylate (0.57 mL, 3.76 mmol), *n*-propyl-2-oxazoline (29.24 mL, 263.53 mmol) and 2-methoxycarbonyl-ethyl-2-oxazoline (15.57 mL, 112.94 mmol) in dry MeCN (50 mL, 4 M),

terminated by the addition of 2-ethanolamine (2.72 mL, 37.65 mmol) afforded the desired polymer **P5a** (46.44 g, 3.62 mmol). **<sup>1</sup>H NMR** [400 MHz,  $\delta$  (ppm), CDCl<sub>3</sub>]: 3.65 (br, 3 H, 6-CH<sub>3</sub>), 3.65–3.30 (br, 8 H, 1-CH<sub>2</sub>), 2.65–2.45 (br, 4 H, 5-CH<sub>2</sub>), 2.40–2.10 (br, 2 H, 2-CH<sub>2</sub>), 1.70–1.50 (br, 2 H, 3-CH<sub>2</sub>), 1.00–0.80 (br, 3 H, 4-CH<sub>3</sub>). Experimentally determined comonomer ratio: *m/n* 70:30. **SEC**: *M<sub>n</sub>* 10.1 kDa, *D* 1.12. **MALDI-TOF MS**: *M<sub>n</sub>* 10.9 kDa. **Yield**: 96%.

### Amidation reaction: Synthesis of Hydroxyl-Functionalized Polymers **P1b–P5b**

#### **P(EtO<sub>x</sub>90-OH<sub>10</sub>) P1b**

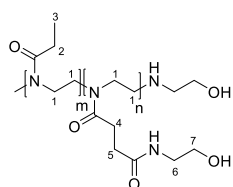

According to the general procedure described in the experimental section, the reaction of **P1a** (43 g, 4.07 mmol) with 2-aminoethanol (8.60 mL, 142.40 mmol) afforded the desired polymer **P1b** (38.05 g, 3.50 mmol). **<sup>1</sup>H NMR** [400 MHz,  $\delta$  (ppm), D<sub>2</sub>O]: 3.65 (br, 2 H, 7-CH<sub>2</sub>), 3.75–3.45 (br, 8 H, 1-CH<sub>2</sub>), 3.35–3.25 (br, 2 H, 6-CH<sub>2</sub>), 2.75–2.60 (br, 2 H, 5-CH<sub>2</sub>), 2.60–2.40 (br, 2 H, 4-CH<sub>2</sub>), 2.45–2.25 (br, 2 H, 2-CH<sub>2</sub>), 1.00–0.80 (br, 3 H, 3-CH<sub>3</sub>). Experimentally determined comonomer ratio: *m/n* 90:10. **MALDI-TOF MS**: *M<sub>n</sub>* 10.2 kDa. **Yield**: 86%.

#### **P(EtO<sub>x</sub>80-OH<sub>20</sub>) P2b**

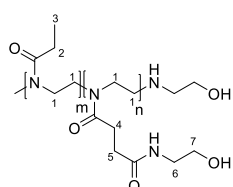

According to the general procedure described in the experimental section, the reaction of **P2a** (34 g, 3.05 mmol) with 2-aminoethanol (12.88 mL, 213.47 mmol) afforded the desired polymer **P2b** (31.46 g, 2.64 mmol). **<sup>1</sup>H NMR** [400 MHz,  $\delta$  (ppm), D<sub>2</sub>O]: 3.65 (br, 2 H, 7-CH<sub>2</sub>), 3.75–3.45 (br, 8 H, 1-CH<sub>2</sub>), 3.35–3.25 (br, 2 H, 6-CH<sub>2</sub>), 2.80–2.60 (br, 2 H, 5-CH<sub>2</sub>), 2.60–2.50 (br, 2 H, 4-CH<sub>2</sub>), 2.50–2.25 (br, 2 H, 2-CH<sub>2</sub>), 1.00–0.80 (br, 3 H, 3-CH<sub>3</sub>). Experimentally determined comonomer ratio: *m/n* 80:20. **MALDI-TOF MS**: *M<sub>n</sub>* 9.9 kDa. **Yield**: 87%.

#### **P(EtO<sub>x</sub>70-OH<sub>30</sub>) P3b**

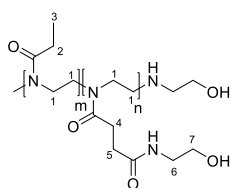

According to the general procedure described in the experimental section, the reaction of **P3a** (51 g, 4.35 mmol) with 2-aminoethanol (27.55 mL, 456.55 mmol) afforded the desired polymer **P3b** (43.98 g, 3.49 mmol).  $^1\text{H}$  NMR [400 MHz,  $\delta$  (ppm),  $\text{D}_2\text{O}$ ]: 3.66 (br, 2 H, 7- $\text{CH}_2$ ), 3.75–3.45 (br, 8 H, 1- $\text{CH}_2$ ), 3.35–3.25 (br, 2 H, 6- $\text{CH}_2$ ), 2.75–2.60 (br, 2 H, 5- $\text{CH}_2$ ), 2.60–2.50 (br, 2 H, 4- $\text{CH}_2$ ), 2.45–2.25 (br, 2 H, 2- $\text{CH}_2$ ), 1.00–0.80 (br, 3 H, 3- $\text{CH}_3$ ). Experimentally determined comonomer ratio:  $m/n$  70:30. **MALDI-TOF MS**:  $M_n$  11.1 kDa. **Yield**: 80%.

### **P(PropOx<sub>90</sub>-OH<sub>10</sub>) P4b**

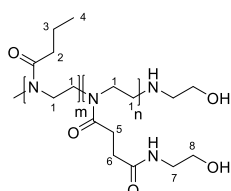

According to the general procedure described in the experimental section, the reaction of **P4a** (42 g, 3.55 mmol) with 2-aminoethanol (21.43 mL, 354.99 mmol) afforded the desired polymer **P4b** (34.49 g, 2.80 mmol).  $^1\text{H}$  NMR [400 MHz,  $\delta$  (ppm),  $\text{D}_2\text{O}$ ]: 3.65 (br, 2 H, 8- $\text{CH}_2$ ), 3.75–3.45 (br, 8 H, 1- $\text{CH}_2$ ), 3.35–3.30 (br, 2 H, 7- $\text{CH}_2$ ), 2.75–2.60 (br, 2 H, 6- $\text{CH}_2$ ), 2.60–2.50 (br, 2 H, 5- $\text{CH}_2$ ), 2.45–2.25 (br, 2 H, 2- $\text{CH}_2$ ), 1.65–1.50 (br, 2 H, 3- $\text{CH}_2$ ), 1.00–0.80 (br, 3 H, 4- $\text{CH}_3$ ). Experimentally determined comonomer ratio:  $m/n$  90:10. **MALDI-TOF MS**:  $M_n$  10.7 kDa. **Yield**: 79%.

### **P(PropOx<sub>70</sub>-OH<sub>30</sub>) P5b**

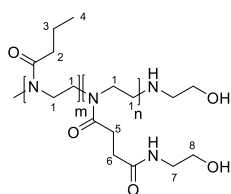

According to the general procedure described in the experimental section, the reaction of **P5a** (46 g, 3.62 mmol) with 2-aminoethanol (22.93 mL, 379.97 mmol) afforded the desired polymer **P5b** (37.13 g, 2.72 mmol).  $^1\text{H}$  NMR [400 MHz,  $\delta$  (ppm),  $\text{D}_2\text{O}$ ]: 3.65 (br, 2 H, 8- $\text{CH}_2$ ), 3.75–3.45 (br, 8 H, 1- $\text{CH}_2$ ), 3.35–3.20 (br, 2 H, 7- $\text{CH}_2$ ), 2.70–2.60 (br, 2 H, 6- $\text{CH}_2$ ), 2.60–2.50 (br, 2 H, 5- $\text{CH}_2$ ), 2.40–2.15 (br, 2 H, 2- $\text{CH}_2$ ), 1.65–1.45 (br, 2 H, 3- $\text{CH}_2$ ), 0.9–0.70 (br, 3 H, 4- $\text{CH}_3$ ). Experimentally determined comonomer ratio:  $m/n$  70:30. **MALDI-TOF MS**:  $M_n$  11.6 kDa. **Yield**: 75%.

## Succinic Anhydride Coupling: Synthesis of Carboxylic Acid-Functionalized Polymers

### P1c–P9c

#### P(EtO<sub>x</sub>90-COOH<sub>10</sub>) P1c

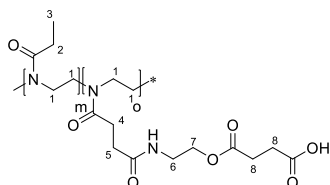

According to the general procedure described in the experimental section, the reaction of a solution of **P1b** (38 g, 3.50 mmol), 4-dimethylamino pyridine (0.86 g, 7.00 mmol) and succinic anhydride (4.20 g, 41.98 mmol) in CH<sub>2</sub>Cl<sub>2</sub>/MeCN 9:1 (27 mL, 2 M) afforded the desired polymer **P1c** (36.01 g, 3.03 mmol). <sup>1</sup>H NMR [400 MHz, δ (ppm), D<sub>2</sub>O]: 4.25–4.15 (br, 2 H, 7-CH<sub>2</sub>), 3.70–3.40 (br, 10 H, 1-CH<sub>2</sub> + 6-CH<sub>2</sub>), 2.75–2.60 (br, 6 H, 5-CH<sub>2</sub> + 8-CH<sub>2</sub>), 2.60–2.45 (br, 2 H, 4-CH<sub>2</sub>), 2.40–2.25 (br, 2 H, 2-CH<sub>2</sub>), 1.10–0.95 (br, 3 H, 3-CH<sub>3</sub>). Experimentally determined comonomer ratio: *m/o* 90:10. **MALDI-TOF MS**: *M*<sub>n</sub> 11.1 kDa. **Yield**: 87%.

#### P(EtO<sub>x</sub>80-COOH<sub>20</sub>) P2c

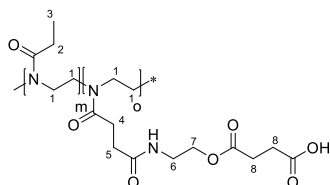

According to the general procedure described in the experimental section, the reaction of a solution of **P2b** (31 g, 2.64 mmol), 4-dimethylamino pyridine (1.29 g, 10.56 mmol) and succinic anhydride (6.34 g, 63.38 mmol) in CH<sub>2</sub>Cl<sub>2</sub>/MeCN 9:1 (38 mL, 2 M) afforded the desired polymer **P2c** (29.74 g, 2.18 mmol). <sup>1</sup>H NMR [400 MHz, δ (ppm), D<sub>2</sub>O]: 4.25–4.15 (br, 2 H, 7-CH<sub>2</sub>), 3.70–3.40 (br, 10 H, 1-CH<sub>2</sub> + 6-CH<sub>2</sub>), 2.75–2.55 (br, 6 H, 5-CH<sub>2</sub> + 8-CH<sub>2</sub>), 2.50–2.45 (br, 2 H, 4-CH<sub>2</sub>), 2.40–2.25 (br, 2 H, 2-CH<sub>2</sub>), 1.10–0.95 (br, 3 H, 3-CH<sub>3</sub>). Experimentally determined comonomer ratio: *m/o* 80:20. **MALDI-TOF MS**: *M*<sub>n</sub> 11.2 kDa. **Yield**: 83%.

#### P(EtO<sub>x</sub>70-COOH<sub>30</sub>) P3c

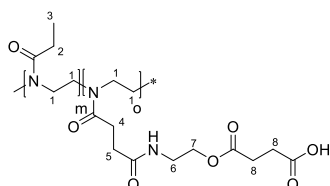

According to the general procedure described in the experimental section, the reaction of a solution of **P3b** (10 g, 0.79 mmol), 4-dimethylamino pyridine (0.58 g, 4.76 mmol) and succinic

anhydride (2.86 g, 28.54 mmol) in CH<sub>2</sub>Cl<sub>2</sub>/MeCN 9:1 (17 mL, 2 M) afforded the desired polymer **P3c** (9.85 g, 0.64 mmol). <sup>1</sup>H NMR [400 MHz, δ (ppm), D<sub>2</sub>O]: 4.25–4.15 (br, 2 H, 7-CH<sub>2</sub>), 3.80–3.45 (br, 10 H, 1-CH<sub>2</sub> + 6-CH<sub>2</sub>), 2.75–2.60 (br, 6 H, 5-CH<sub>2</sub> + 8-CH<sub>2</sub>), 2.60–2.45 (br, 2 H, 4-CH<sub>2</sub>), 2.40–2.25 (br, 2 H, 2-CH<sub>2</sub>), 1.15–1.00 (br, 3 H, 3-CH<sub>3</sub>). Experimentally determined comonomer ratio: *m/o* 70:30. **MALDI-TOF MS**: *M<sub>n</sub>* 13.5 kDa. **Yield**: 81%.

### P(PropOx<sub>90</sub>-COOH<sub>10</sub>) **P4c**

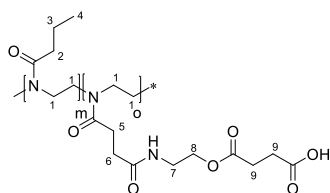

According to the general procedure described in the experimental section, the reaction of a solution of **P4b** (28 g, 2.31 mmol), 4-dimethylamino pyridine (0.56 g, 4.62 mmol) and succinic anhydride (2.67 g, 26.7 mmol) in CH<sub>2</sub>Cl<sub>2</sub>/MeCN 9:1 (17 mL, 2 M) afforded the desired polymer **P4c** (21.20 g, 1.61 mmol). <sup>1</sup>H NMR [400 MHz, δ (ppm), D<sub>2</sub>O]: 4.10–4.00 (br, 2 H, 8-CH<sub>2</sub>), 3.60–3.20 (br, 10 H, 1-CH<sub>2</sub> + 7-CH<sub>2</sub>), 2.65–2.50 (br, 6 H, 6-CH<sub>2</sub> + 9-CH<sub>2</sub>), 2.50–2.30 (br, 2 H, 5-CH<sub>2</sub>), 2.30–2.10 (br, 2 H, 2-CH<sub>2</sub>), 1.55–1.40 (br, 2 H, 3-CH<sub>2</sub>), 1.00–0.80 (br, 3 H, 4-CH<sub>3</sub>). Experimentally determined comonomer ratio: *m/o* 90:10. **MALDI-TOF MS**: *M<sub>n</sub>* 11.5 kDa. **Yield**: 70%.

### P(PropOx<sub>70</sub>-COOH<sub>30</sub>) **P5c**

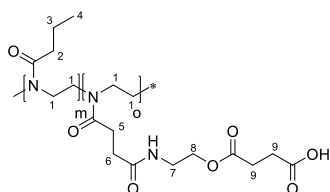

According to the general procedure described in the experimental section, the reaction of a solution of **P5b** (34 g, 2.50 mmol), 4-dimethylamino pyridine (1.83 g, 15.01 mmol) and succinic anhydride (9.01 g, 90.03 mmol) in CH<sub>2</sub>Cl<sub>2</sub>/MeCN 9:1 (54 mL, 2 M) afforded the desired polymer **P5c** (39.91 g, 2.41 mmol). <sup>1</sup>H NMR [400 MHz, δ (ppm), D<sub>2</sub>O]: 4.05–3.85 (br, 2 H, 8-CH<sub>2</sub>), 3.55–3.10 (br, 10 H, 1-CH<sub>2</sub> + 7-CH<sub>2</sub>), 2.65–2.50 (br, 6 H, 6-CH<sub>2</sub> + 9-CH<sub>2</sub>), 2.50–2.10 (br, 4 H, 2-CH<sub>2</sub> + 5-CH<sub>2</sub>), 1.55–1.35 (br, 2 H, 3-CH<sub>2</sub>), 0.90–0.75 (br, 3 H, 4-CH<sub>3</sub>). Experimentally determined comonomer ratio: *m/o* 70:30. **MALDI-TOF MS**: *M<sub>n</sub>* 12.1 kDa. **Yield**: 96%.

### P(EtOx<sub>70</sub>-OH<sub>20</sub>-COOH<sub>10</sub>) P6c

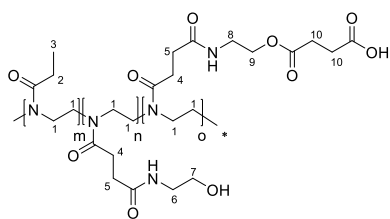

According to the general procedure described in the experimental section, the reaction of a solution of **P3b** (15 g, 1.19 mmol), 4-dimethylamino pyridine (0.29 g, 2.38 mmol) and succinic anhydride (1.43 g, 14.27 mmol) in CH<sub>2</sub>Cl<sub>2</sub>/MeCN 9:1 (9 mL, 2 M) afforded the desired polymer **P6c** (12.28 g, 0.90 mmol). <sup>1</sup>H NMR [400 MHz, δ (ppm), D<sub>2</sub>O]: 4.25–4.15 (br, 2 H, 9-CH<sub>2</sub>), 3.80–3.45 (br, 16 H, 1-CH<sub>2</sub> + 7-CH<sub>2</sub> + 8-CH<sub>2</sub>), 3.35–3.25 (br, 2 H, 6-CH<sub>2</sub>), 2.75–2.60 (br, 8 H, 5-CH<sub>2</sub> + 10-CH<sub>2</sub>), 2.60–2.45 (br, 4 H, 4-CH<sub>2</sub>), 2.45–2.25 (br, 2 H, 2-CH<sub>2</sub>), 1.15–1.00 (br, 3 H, 3-CH<sub>3</sub>). Experimentally determined comonomer ratio: *m/n/o* 70:21:9. MALDI-TOF MS: *M*<sub>n</sub> 12.2 kDa. Yield: 76%.

### P(EtOx<sub>70</sub>-OH<sub>10</sub>-COOH<sub>20</sub>) P7c

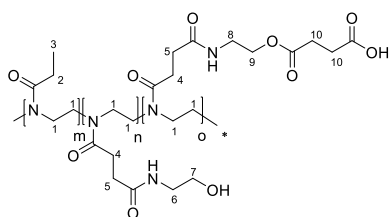

According to the general procedure described in the experimental section, the reaction of a solution of **P3b** (15 g, 1.19 mmol), 4-dimethylamino pyridine (0.58 g, 4.76 mmol) and succinic anhydride (2.86 g, 28.54 mmol) in CH<sub>2</sub>Cl<sub>2</sub>/MeCN 9:1 (17 mL, 2 M) afforded the desired polymer **P7c** (17.33 g, 1.19 mmol). <sup>1</sup>H NMR [400 MHz, δ (ppm), D<sub>2</sub>O]: 4.25–4.15 (br, 2 H, 9-CH<sub>2</sub>), 3.80–3.45 (br, 16 H, 1-CH<sub>2</sub> + 7-CH<sub>2</sub> + 8-CH<sub>2</sub>), 3.35–3.25 (br, 2 H, 6-CH<sub>2</sub>), 2.75–2.60 (br, 8 H, 5-CH<sub>2</sub> + 10-CH<sub>2</sub>), 2.60–2.45 (br, 4 H, 4-CH<sub>2</sub>), 2.40–2.25 (br, 2 H, 2-CH<sub>2</sub>), 1.15–1.00 (br, 3 H, 3-CH<sub>3</sub>). Experimentally determined comonomer ratio: *m/n/o* 70:12:18. MALDI-TOF MS: *M*<sub>n</sub> 12.5 kDa. Yield: 94%.

### P(PropOx<sub>70</sub>-OH<sub>20</sub>-COOH<sub>10</sub>) P8c

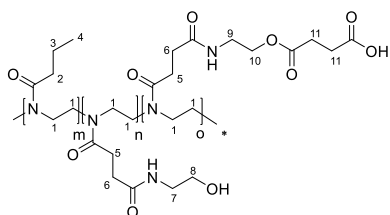

According to the general procedure described in the experimental section, the reaction of a solution of **P5b** (13 g, 0.96 mmol), 4-dimethylamino pyridine (0.23 g, 1.91 mmol) and succinic anhydride (1.15 g, 11.47 mmol) in



CH<sub>2</sub>Cl<sub>2</sub>/MeCN 9:1 (7 mL, 2 M) afforded the desired polymer **P8c** (11.62 g, 0.80 mmol). <sup>1</sup>H NMR [400 MHz, δ (ppm), D<sub>2</sub>O]: 4.10–3.90 (br, 2 H, 10-CH<sub>2</sub>), 3.70–3.20 (br, 16 H, 1-CH<sub>2</sub> + 8-CH<sub>2</sub> + 9-CH<sub>2</sub>), 3.15–3.00 (br, 2 H, 7-CH<sub>2</sub>), 2.75–2.60 (br, 8 H, 6-CH<sub>2</sub> + 11-CH<sub>2</sub>), 2.65–2.40 (br, 4 H, 5-CH<sub>2</sub>), 2.40–2.10 (br, 2 H, 2-CH<sub>2</sub>), 1.60–1.35 (br, 2 H, 3-CH<sub>2</sub>), 1.00–0.70 (br, 3 H, 4-CH<sub>3</sub>). Experimentally determined comonomer ratio: *m/n/o* 70:20:10. MALDI-TOF MS: *M<sub>n</sub>* 11.5 kDa. **Yield:** 79%.

### P(PropOx<sub>70</sub>-OH<sub>10</sub>-COOH<sub>20</sub>) **P9c**

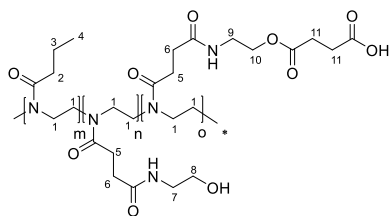

According to the general procedure described in the experimental section, the reaction of a solution of **P5b** (38 g, 2.80 mmol), 4-dimethylamino pyridine (1.37 g, 11.18 mmol) and succinic anhydride (6.71 g, 67.08 mmol) in

CH<sub>2</sub>Cl<sub>2</sub>/MeCN 9:1 (41 mL, 2 M) afforded the desired polymer **P9c** (41.10 g, 2.64 mmol). <sup>1</sup>H NMR [400 MHz, δ (ppm), D<sub>2</sub>O]: 4.10–3.90 (br, 2 H, 10-CH<sub>2</sub>), 3.70–3.20 (br, 16 H, 1-CH<sub>2</sub> + 8-CH<sub>2</sub> + 9-CH<sub>2</sub>), 3.15–3.00 (br, 2 H, 7-CH<sub>2</sub>), 2.65–2.60 (br, 8 H, 6-CH<sub>2</sub> + 11-CH<sub>2</sub>), 2.65–2.40 (br, 4 H, 5-CH<sub>2</sub>), 2.40–2.10 (br, 2 H, 2-CH<sub>2</sub>), 1.60–1.35 (br, 2 H, 3-CH<sub>2</sub>), 1.00–0.70 (br, 3 H, 4-CH<sub>3</sub>). Experimentally determined comonomer ratio: *m/n/o* 70:10:20. MALDI-TOF MS: *M<sub>n</sub>* 12.8 kDa. **Yield:** 94%.

## Carbodiimide Reaction: Synthesis of *N*-Hydroxysuccinimide-Functionalized Polymers

### **P1d–P9d**

#### **P(EtOx<sub>90</sub>-NHS<sub>10</sub>) **P1d****

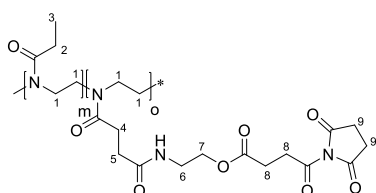

According to the general procedure described in the experimental section, the reaction of a solution of **P1c** (6 g, 0.51 mmol), *N*-hydroxysuccinimide (0.64 g, 5.57 mmol) and

*N,N'*-diisopropylcarbodiimide (0.94 mL, 6.07 mmol) in CH<sub>2</sub>Cl<sub>2</sub>/MeCN 9:1 (60 mL, 0.2 M)

afforded the desired polymer **P1d** (5.65 g, 0.44 mmol). <sup>1</sup>H NMR [400 MHz, δ (ppm), DMSO-d<sub>6</sub>]: 4.00–3.90 (br, 2 H, 7-CH<sub>2</sub>), 3.50–3.10 (br, 10 H, 1-CH<sub>2</sub> + 6-CH<sub>2</sub>), 2.90–2.85 (br, 2 H, 8-CH<sub>2</sub>), 2.75–2.70 (br, 4 H, 9-CH<sub>2</sub>), 2.65–2.60 (br, 2 H, 8-CH<sub>2</sub>), 2.60–2.40 (br, 2 H, 5-CH<sub>2</sub>), 2.30–2.10 (br, 4 H, 2-CH<sub>2</sub> + 4-CH<sub>2</sub>), 0.85–0.70 (br, 3 H, 3-CH<sub>3</sub>). Experimentally determined comonomer ratio: *m/o* 90:10. SEC: *M*<sub>n</sub> 11.7 kDa, *D* 1.25. MALDI-TOF MS: *M*<sub>n</sub> 11.5 kDa. Yield: 87%.

### P(EtOx<sub>80</sub>-NHS<sub>20</sub>) P2d

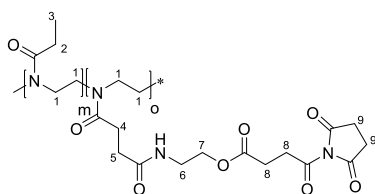

According to the general procedure described in the experimental section, the reaction of a solution of **P2c** (33 g, 2.40 mmol), *N*-hydroxysuccinimide (6.08 g, 52.87 mmol) and *N,N'*-diisopropylcarbodiimide (8.93 mL, 57.67 mmol) in CH<sub>2</sub>Cl<sub>2</sub>/MeCN 9:1 (556 mL, 0.2 M) afforded the desired polymer **P2d** (35.63 g, 2.27 mmol). <sup>1</sup>H NMR [400 MHz, δ (ppm), DMSO-d<sub>6</sub>]: 4.00–3.90 (br, 2 H, 7-CH<sub>2</sub>), 3.50–3.10 (br, 10 H, 1-CH<sub>2</sub> + 6-CH<sub>2</sub>), 2.90–2.85 (br, 2 H, 8-CH<sub>2</sub>), 2.75–2.70 (br, 4 H, 9-CH<sub>2</sub>), 2.65–2.60 (br, 2 H, 8-CH<sub>2</sub>), 2.60–2.40 (br, 2 H, 5-CH<sub>2</sub>), 2.30–2.10 (br, 4 H, 2-CH<sub>2</sub> + 4-CH<sub>2</sub>), 0.85–0.70 (br, 3 H, 3-CH<sub>3</sub>). Experimentally determined comonomer ratio: *m/o* 80:20. SEC: *M*<sub>n</sub> 12.6 kDa, *D* 1.21. MALDI-TOF MS: *M*<sub>n</sub> 13.0 kDa. Yield: 95%.

### P(EtOx<sub>70</sub>-NHS<sub>30</sub>) P3d

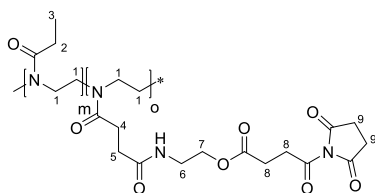

According to the general procedure described in the experimental section, the reaction of a solution of **P3c** (61 g, 3.91 mmol), *N*-hydroxysuccinimide (14.85 g, 129.00 mmol) and *N,N'*-diisopropylcarbodiimide (21.79 mL, 140.72 mmol) in CH<sub>2</sub>Cl<sub>2</sub>/MeCN 9:1 (1346 mL, 0.2 M) afforded the desired polymer **P3d** (57.06 g, mmol). <sup>1</sup>H NMR [400 MHz, δ (ppm), DMSO-d<sub>6</sub>]: 4.00–3.90 (br, 2 H, 7-CH<sub>2</sub>), 3.50–3.10 (br, 10 H, 1-CH<sub>2</sub> + 6-CH<sub>2</sub>), 2.90–2.85 (br, 2 H, 8-CH<sub>2</sub>), 2.75–2.70 (br, 4 H, 9-CH<sub>2</sub>), 2.65–2.60 (br, 2 H, 8-CH<sub>2</sub>), 2.60–2.40 (br, 2 H, 5-

$\text{CH}_2$ ), 2.30–2.10 (br, 4 H, 2- $\text{CH}_2$  + 4- $\text{CH}_2$ ), 0.85–0.70 (br, 3 H, 3- $\text{CH}_3$ ). Experimentally determined comonomer ratio: *m/o* 70:30. **SEC:**  $M_n$  15.6 kDa,  $D$  1.25. **MALDI-TOF MS:**  $M_n$  16.9 kDa. **Yield:** 79%.

### P(PropOx<sub>90</sub>-NHS<sub>10</sub>) P4d

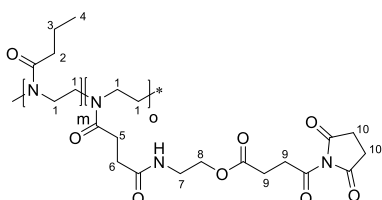

According to the general procedure described in the experimental section, the reaction of a solution of **P4c** (20 g, 1.52 mmol), *N*-hydroxysuccinimide (1.93 g, 16.76 mmol) and *N,N'*-diisopropylcarbodiimide (2.83 mL, 18.29 mmol) in  $\text{CH}_2\text{Cl}_2/\text{MeCN}$  9:1 (180 mL, 0.2 M) afforded the desired polymer **P4d** (19.88 g, 1.41 mmol). **<sup>1</sup>H NMR** [400 MHz,  $\delta$  (ppm),  $\text{DMSO-d}_6$ ]: 4.10–4.00 (br, 2 H, 8- $\text{CH}_2$ ), 3.50–3.30 (br, 10 H, 1- $\text{CH}_2$  + 7- $\text{CH}_2$ ), 2.95–2.90 (br, 2 H, 9- $\text{CH}_2$ ), 2.75–2.70 (br, 4 H, 10- $\text{CH}_2$ ), 2.70–2.65 (br, 2 H, 9- $\text{CH}_2$ ), 2.65–2.40 (br, 2 H, 6- $\text{CH}_2$ ), 2.35–2.10 (br, 4 H, 2- $\text{CH}_2$  + 5- $\text{CH}_2$ ), 1.60–1.40 (br, 2 H, 3- $\text{CH}_2$ ), 0.90–0.80 (br, 3 H, 4- $\text{CH}_3$ ). Experimentally determined comonomer ratio: *m/o* 90:10. **SEC:**  $M_n$  12.2 kDa,  $D$  1.21. **MALDI-TOF MS:**  $M_n$  12.1 kDa. **Yield:** 93%.

### P(PropOx<sub>70</sub>-NHS<sub>30</sub>) P5d

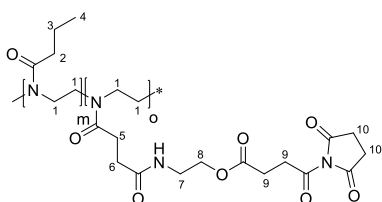

According to the general procedure described in the experimental section, the reaction of a solution of **P5c** (28 g, 1.69 mmol), *N*-hydroxysuccinimide (6.41 g, 55.71 mmol) and *N,N'*-diisopropylcarbodiimide (9.41 mL, 60.77 mmol) in  $\text{CH}_2\text{Cl}_2/\text{MeCN}$  9:1 (581 mL, 0.2 M) afforded the desired polymer **P5d** (26.28 g, 1.35 mmol). **<sup>1</sup>H NMR** [400 MHz,  $\delta$  (ppm),  $\text{DMSO-d}_6$ ]: 4.00–3.90 (br, 2 H, 8- $\text{CH}_2$ ), 3.50–3.10 (br, 10 H, 1- $\text{CH}_2$  + 7- $\text{CH}_2$ ), 2.90–2.85 (br, 2 H, 9- $\text{CH}_2$ ), 2.75–2.70 (br, 4 H, 10- $\text{CH}_2$ ), 2.65–2.60 (br, 2 H, 9- $\text{CH}_2$ ), 2.60–2.40 (br, 2 H, 6- $\text{CH}_2$ ), 2.35–2.10 (br, 4 H, 2- $\text{CH}_2$  + 5- $\text{CH}_2$ ), 1.65–1.40 (br, 2 H, 3- $\text{CH}_2$ ), 0.85–0.70 (br, 3 H, 4- $\text{CH}_3$ ). Experimentally determined comonomer ratio: *m/o* 90:10. **SEC:**  $M_n$  15.7 kDa,  $D$  1.20. **MALDI-TOF MS:**  $M_n$  13.7 kDa. **Yield:** 80%.

### P(EtOx<sub>70</sub>-OH<sub>20</sub>-NHS<sub>10</sub>) P6d

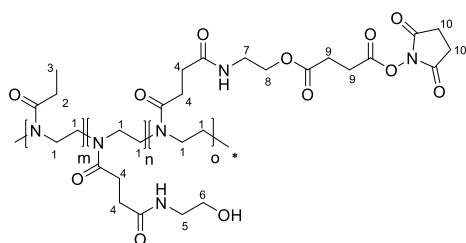

According to the general procedure described in the experimental section, the reaction of a solution of **P6c** (12 g, 0.88 mmol), *N*-hydroxysuccinimide (1.12 g, 9.70 mmol) and *N,N'*-diisopropylcarbodiimide (1.64 mL,

10.58 mmol) in CH<sub>2</sub>Cl<sub>2</sub>/MeCN 9:1 (104 mL, 0.2 M) afforded the desired polymer **P6d** (11.48 g, 0.79 mmol). <sup>1</sup>H NMR [400 MHz, δ (ppm), DMSO-d<sub>6</sub>]: 4.25–4.15 (br, 2 H, 8-CH<sub>2</sub>), 3.75–3.40 (br, 16 H, 1-CH<sub>2</sub> + 6-CH<sub>2</sub> + 7-CH<sub>2</sub>), 3.35–3.25 (br, 2 H, 5-CH<sub>2</sub>), 3.10–3.00 (br, 2 H, 9-CH<sub>2</sub>), 3.00–2.90 (br, 4 H, 10-CH<sub>2</sub>), 2.90–2.80 (br, 2 H, 9-CH<sub>2</sub>), 2.65–2.45 (br, 8 H, 4-CH<sub>2</sub>), 2.45–2.25 (br, 2 H, 2-CH<sub>2</sub>), 1.10–1.00 (br, 3 H, 3-CH<sub>3</sub>). Experimentally determined comonomer ratio: *m/n/o* 70:21:9. SEC: *M*<sub>n</sub> 12.7 kDa, *D* 1.25. MALDI-TOF MS: *M*<sub>n</sub> 12.6 kDa.

**Yield:** 89%.

### P(EtOx<sub>70</sub>-OH<sub>10</sub>-NHS<sub>20</sub>) P7d

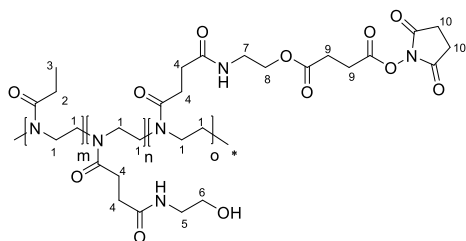

According to the general procedure described in the experimental section, the reaction of a solution of **P7c** (12 g, 0.82 mmol), *N*-hydroxysuccinimide (2.08 g, 18.07 mmol) and *N,N'*-diisopropylcarbodiimide (3.05

mL, 19.72 mmol) in CH<sub>2</sub>Cl<sub>2</sub>/MeCN 9:1 (190 mL, 0.2 M) afforded the desired polymer **P7d** (11.95 g, 0.72 mmol). <sup>1</sup>H NMR [400 MHz, δ (ppm), DMSO-d<sub>6</sub>]: 4.15–4.00 (br, 2 H, 8-CH<sub>2</sub>), 3.75–3.40 (br, 16 H, 1-CH<sub>2</sub> + 6-CH<sub>2</sub> + 7-CH<sub>2</sub>), 3.35–3.25 (br, 2 H, 5-CH<sub>2</sub>), 3.05–2.95 (br, 2 H, 9-CH<sub>2</sub>), 2.95–2.85 (br, 4 H, 10-CH<sub>2</sub>), 2.85–2.70 (br, 2 H, 9-CH<sub>2</sub>), 2.75–2.65 (br, 8 H, 4-CH<sub>2</sub>), 2.40–2.10 (br, 2 H, 2-CH<sub>2</sub>), 1.05–0.95 (br, 3 H, 3-CH<sub>3</sub>). Experimentally determined comonomer ratio: *m/n/o* 70:12:18. SEC: *M*<sub>n</sub> 14.7 kDa, *D* 1.25. MALDI-TOF MS: *M*<sub>n</sub> 14.4 kDa. **Yield:** 88%.

### P(PropOx<sub>70</sub>-OH<sub>20</sub>-NHS<sub>10</sub>) P8d

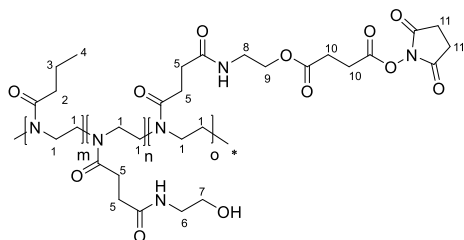

According to the general procedure described in the experimental section, the reaction of a solution of **P8c**

(20 g, 1.37 mmol), *N*-hydroxysuccinimide (1.74 g,

15.08 mmol) and *N,N'*-diisopropylcarbodiimide (2.55

mL, 16.45 mmol) in CH<sub>2</sub>Cl<sub>2</sub>/MeCN 9:1 (162 mL, 0.2 M) afforded the desired polymer **P8d**

(17.41 g, 1.12 mmol). <sup>1</sup>H NMR [400 MHz, δ (ppm), DMSO-d<sub>6</sub>]: 4.15–4.00 (br, 2 H, 9-CH<sub>2</sub>),

3.55–3.30 (br, 16 H, 1-CH<sub>2</sub> + 7-CH<sub>2</sub> + 8-CH<sub>2</sub>), 3.30–3.20 (br, 2 H, 6-CH<sub>2</sub>), 3.00–2.90 (br, 2 H,

10-CH<sub>2</sub>), 2.85–2.75 (br, 4 H, 11-CH<sub>2</sub>), 2.75–2.65 (br, 2 H, 10-CH<sub>2</sub>), 2.65–2.45 (br, 8 H, 5-

CH<sub>2</sub>), 2.35–2.05 (br, 2 H, 2-CH<sub>2</sub>), 1.55–1.30 (br, 2 H, 3-CH<sub>2</sub>), 0.90–0.70 (br, 3 H, 4-CH<sub>3</sub>).

Experimentally determined comonomer ratio: *m/n/o* 70:20:10. SEC: *M<sub>n</sub>* 12.2 kDa, *D* 1.25.

**MALDI-TOF MS:** *M<sub>n</sub>* 12.1 kDa. **Yield:** 70%.

#### **P(PropOx<sub>70</sub>-OH<sub>10</sub>-NHS<sub>20</sub>) P9d**

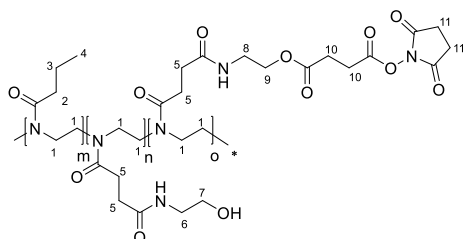

According to the general procedure described in the

experimental section, the reaction of a solution of **P9c**

(41 g, 2.63 mmol), *N*-hydroxysuccinimide (6.66 g,

57.86 mmol) and *N,N'*-diisopropylcarbodiimide (9.77

mL, 63.12 mmol) in CH<sub>2</sub>Cl<sub>2</sub>/MeCN 9:1 (608 mL, 0.2 M) afforded the desired polymer **P9d**

(38.62 g, 2.20 mmol). <sup>1</sup>H NMR [400 MHz, δ (ppm), DMSO-d<sub>6</sub>]: 4.05–3.90 (br, 2 H, 9-CH<sub>2</sub>),

3.55–3.30 (br, 16 H, 1-CH<sub>2</sub> + 7-CH<sub>2</sub> + 8-CH<sub>2</sub>), 3.30–3.20 (br, 2 H, 6-CH<sub>2</sub>), 3.05–2.95 (br, 2 H,

10-CH<sub>2</sub>), 2.95–2.85 (br, 4 H, 11-CH<sub>2</sub>), 2.85–2.70 (br, 2 H, 10-CH<sub>2</sub>), 2.70–2.55 (br, 8 H, 5-

CH<sub>2</sub>), 2.35–2.05 (br, 2 H, 2-CH<sub>2</sub>), 1.55–1.30 (br, 2 H, 3-CH<sub>2</sub>), 0.90–0.70 (br, 3 H, 4-CH<sub>3</sub>).

Experimentally determined comonomer ratio: *m/n/o* 70:10:20. SEC: *M<sub>n</sub>* 14.9 kDa, *D* 1.21.

**MALDI-TOF MS:** *M<sub>n</sub>* 14.4 kDa. **Yield:** 84%.

#### **Amidation Reaction: Synthesis of Alendronate-Functionalized Polymers P1e–P13e**

### P(EtOx<sub>90</sub>-Ale<sub>10</sub>) P1e

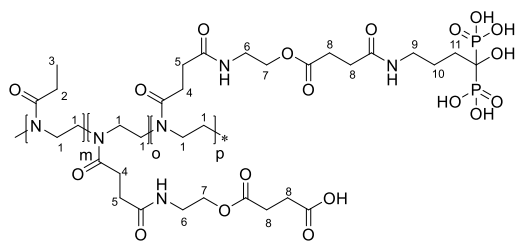

According to the general procedure described in the experimental section, the reaction of a solution of **P1d** (5.0 g, 0.39 mmol), sodium alendronate trihydrate (2.53 g, 7.79 mmol), *N*-hydroxysuccinimide (0.45 g, 3.90 mmol) and *N*-(3-dimethylaminopropyl)-*N*'-ethylcarbodiimide hydrochloride (0.75 g, 3.90 mmol) in PBS (32 mL, 0.5 M) afforded the desired polymer **P1e** (1.29 g, 0.09 mmol). <sup>1</sup>H NMR [400 MHz, δ (ppm), D<sub>2</sub>O]: 4.30–4.10 (br, 4 H, 7-CH<sub>2</sub>), 3.75–3.40 (br, 16 H, 1-CH<sub>2</sub> + 6-CH<sub>2</sub>), 3.30–3.20 (br, 2 H, 9-CH<sub>2</sub>), 2.75–2.45 (br, 16 H, 4-CH<sub>2</sub> + 5-CH<sub>2</sub> + 8-CH<sub>2</sub>), 2.45–2.20 (br, 2 H, 2-CH<sub>2</sub>), 2.05–1.75 (br, 4 H, 10-CH<sub>2</sub> + 11-CH<sub>2</sub>), 1.15–0.95 (br, 3 H, 3-CH<sub>3</sub>). <sup>31</sup>P NMR [400 MHz, δ (ppm), D<sub>2</sub>O]: 18.19. Experimentally determined comonomer ratio: *m/o/p* 90:1:9. MALDI-TOF MS: *M*<sub>n</sub> 12.0 kDa. Yield: 24%.

### P(EtOx<sub>80</sub>-Ale<sub>20</sub>) P2e

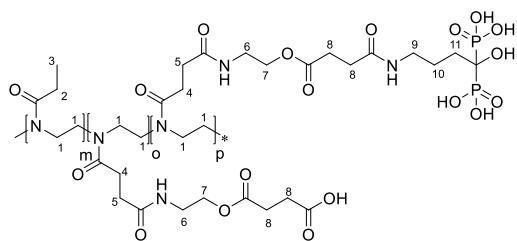

According to the general procedure described in the experimental section, the reaction of a solution of **P2d** (15 g, 0.96 mmol), sodium alendronate trihydrate (12.45 g, 38.28 mmol), *N*-hydroxysuccinimide (2.20 g, 19.14 mmol) and *N*-(3-dimethylaminopropyl)-*N*'-ethylcarbodiimide hydrochloride (3.67 g, 19.14 mmol) in PBS (155 mL, 0.5 M) afforded the desired polymer **P2e** (5.47 g, 0.30 mmol). <sup>1</sup>H NMR [400 MHz, δ (ppm), D<sub>2</sub>O]: 4.25–4.10 (br, 4 H, 7-CH<sub>2</sub>), 3.80–3.35 (br, 16 H, 1-CH<sub>2</sub> + 6-CH<sub>2</sub>), 3.30–3.20 (br, 2 H, 9-CH<sub>2</sub>), 2.75–2.45 (br, 16 H, 4-CH<sub>2</sub> + 5-CH<sub>2</sub> + 8-CH<sub>2</sub>), 2.45–2.25 (br, 2 H, 2-CH<sub>2</sub>), 2.05–1.75 (br, 4 H, 10-CH<sub>2</sub> + 11-CH<sub>2</sub>), 1.15–0.95 (br, 3 H, 3-CH<sub>3</sub>). Experimentally determined comonomer ratio: *m/o/p* 80:1:19. <sup>31</sup>P NMR [400 MHz, δ (ppm), D<sub>2</sub>O]: 18.15. MALDI-TOF MS: *M*<sub>n</sub> 15.0 kDa. Yield: 31%.

### P(EtOx<sub>70</sub>-Ale<sub>30</sub>) P3e

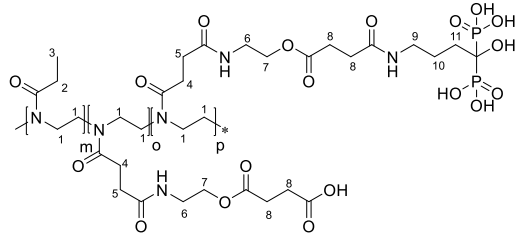

According to the general procedure described in the experimental section, the reaction of a solution of **P3d** (15 g, 0.81 mmol), sodium alendronate trihydrate (15.80 g, 48.61 mmol), *N*-hydroxysuccinimide (2.80 g, 24.31 mmol) and *N*-(3-dimethylaminopropyl)-*N*'-ethylcarbodiimide hydrochloride (4.66 g, 24.31 mmol) in PBS (66 mL, 0.5 M) afforded the desired polymer **P3e** (5.81 g, 0.26 mmol).  $^1\text{H NMR}$  [400 MHz,  $\delta$  (ppm),  $\text{D}_2\text{O}$ ]: 4.25–4.10 (br, 4 H, 7- $\text{CH}_2$ ), 3.80–3.30 (br, 16 H, 1- $\text{CH}_2$  + 6- $\text{CH}_2$ ), 3.25–3.15 (br, 2 H, 9- $\text{CH}_2$ ), 2.75–2.45 (br, 16 H, 4- $\text{CH}_2$  + 5- $\text{CH}_2$  + 8- $\text{CH}_2$ ), 2.45–2.15 (br, 2 H, 2- $\text{CH}_2$ ), 2.15–1.70 (br, 4 H, 10- $\text{CH}_2$  + 11- $\text{CH}_2$ ), 1.15–0.95 (br, 3 H, 3- $\text{CH}_3$ ).  $^{31}\text{P NMR}$  [400 MHz,  $\delta$  (ppm),  $\text{D}_2\text{O}$ ]: 18.25. Experimentally determined comonomer ratio: *m/o/p* 70:2:28. **MALDI-TOF MS**:  $M_n$  19.5 kDa. **Yield**: 32%.

#### **P(PropOx<sub>90</sub>-Ale<sub>10</sub>) P4e**

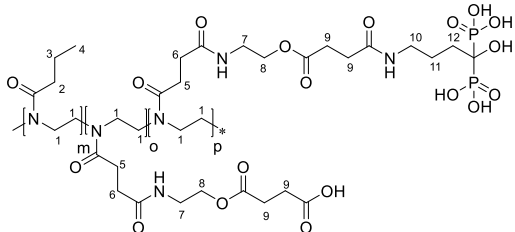

According to the general procedure described in the experimental section, the reaction of a solution of **P4d** (15 g, 1.06 mmol), sodium alendronate trihydrate (6.92 g, 21.29 mmol), *N*-hydroxysuccinimide (1.23 g, 10.64 mmol) and *N*-(3-dimethylaminopropyl)-*N*'-ethylcarbodiimide hydrochloride (2.04 g, 10.64 mmol) in PBS (87 mL, 0.5 M) afforded the desired polymer **P4e** (6.57 g, 0.43 mmol).  $^1\text{H NMR}$  [400 MHz,  $\delta$  (ppm),  $\text{D}_2\text{O}$ ]: 4.30–4.15 (br, 4 H, 8- $\text{CH}_2$ ), 3.80–3.30 (br, 16 H, 1- $\text{CH}_2$  + 7- $\text{CH}_2$ ), 3.30–3.20 (br, 2 H, 10- $\text{CH}_2$ ), 2.75–2.45 (br, 16 H, 5- $\text{CH}_2$  + 6- $\text{CH}_2$  + 9- $\text{CH}_2$ ), 2.45–2.15 (br, 2 H, 2- $\text{CH}_2$ ), 2.05–1.75 (br, 4 H, 11- $\text{CH}_2$  + 12- $\text{CH}_2$ ), 1.65–1.45 (br, 2 H, 3- $\text{CH}_2$ ), 1.15–0.95 (br, 3 H, 4- $\text{CH}_3$ ).  $^{31}\text{P NMR}$  [400 MHz,  $\delta$  (ppm),  $\text{D}_2\text{O}$ ]: 18.17. Experimentally determined comonomer ratio: *m/o/p* 90:1:9. **MALDI-TOF MS**:  $M_n$  12.2 kDa. **Yield**: 40%.

#### **P(PropOx<sub>70</sub>-Ale<sub>30</sub>) P5e**

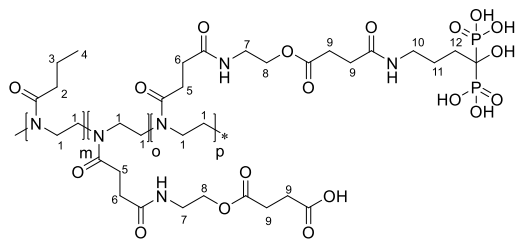

According to the general procedure described in the experimental section, the reaction of a solution of **P5d** (8.0 g, 0.41 mmol), sodium alendronate trihydrate (8.00 g, 24.62 mmol), *N*-hydroxysuccinimide (1.42 g, 12.31 mmol) and *N*-(3-dimethylaminopropyl)-*N*'-ethylcarbodiimide hydrochloride (2.36 g, 12.31 mmol) in PBS (99 mL, 0.5 M) afforded the desired polymer **P5e** (2.93 g, 0.13 mmol). **<sup>1</sup>H NMR** [400 MHz,  $\delta$  (ppm), D<sub>2</sub>O]: 4.30–4.15 (br, 4 H, 8-CH<sub>2</sub>), 3.80–3.30 (br, 16 H, 1-CH<sub>2</sub> + 7-CH<sub>2</sub>), 3.20–3.10 (br, 2 H, 10-CH<sub>2</sub>), 2.75–2.45 (br, 16 H, 5-CH<sub>2</sub> + 6-CH<sub>2</sub> + 9-CH<sub>2</sub>), 2.45–2.15 (br, 2 H, 2-CH<sub>2</sub>), 2.05–1.75 (br, 4 H, 11-CH<sub>2</sub> + 12-CH<sub>2</sub>), 1.65–1.45 (br, 2 H, 3-CH<sub>2</sub>), 1.00–0.85 (br, 3 H, 4-CH<sub>3</sub>). **<sup>31</sup>P NMR** [400 MHz,  $\delta$  (ppm), D<sub>2</sub>O]: 18.15. Experimentally determined comonomer ratio: *m/o/p* 70:3:27. **MALDI-TOF MS**: *M<sub>n</sub>* 17.5 kDa. **Yield**: 31%.

### P(EtOx<sub>70</sub>-OH<sub>20</sub>-Ale<sub>10</sub>) P6e

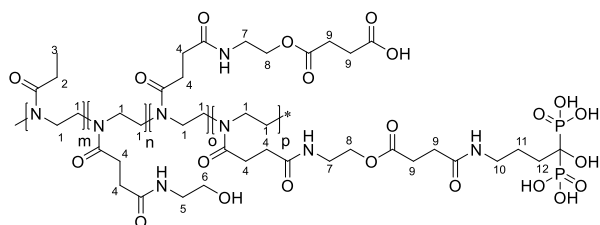

According to the general procedure described in the experimental section, the reaction of a solution of **P6d** (12 g, 0.83 mmol), sodium alendronate trihydrate (4.88 g, 15.02 mmol), *N*-hydroxysuccinimide (0.86 g, 7.51 mmol) and *N*-(3-dimethylaminopropyl)-*N*'-ethylcarbodiimide hydrochloride (1.44 g, 7.51 mmol) in PBS (62 mL, 0.5 M) afforded the desired polymer **P6e** (3.41 g, 0.22 mmol). **<sup>1</sup>H NMR** [400 MHz,  $\delta$  (ppm), D<sub>2</sub>O]: 4.30–4.10 (br, 4 H, 8-CH<sub>2</sub>), 3.80–3.40 (br, 22 H, 1-CH<sub>2</sub> + 6-CH<sub>2</sub> + 7-CH<sub>2</sub>), 3.40–3.30 (br, 2 H, 5-CH<sub>2</sub>), 3.30–3.20 (br, 2 H, 10-CH<sub>2</sub>), 2.75–2.15 (br, 22 H, 2-CH<sub>2</sub> + 4-CH<sub>2</sub> + 9-CH<sub>2</sub>), 2.05–1.75 (br, 4 H, 11-CH<sub>2</sub> + 12-CH<sub>2</sub>), 1.15–0.95 (br, 3 H, 3-CH<sub>3</sub>). **<sup>31</sup>P NMR** [400 MHz,  $\delta$  (ppm), D<sub>2</sub>O]: 18.15. Experimentally determined comonomer ratio: *m/n/o/p* 70:21:1:8. **MALDI-TOF MS**: *M<sub>n</sub>* 12.6 kDa. **Yield**: 26%.



### P(EtOx<sub>70</sub>-OH<sub>10</sub>-Ale<sub>20</sub>) P7e

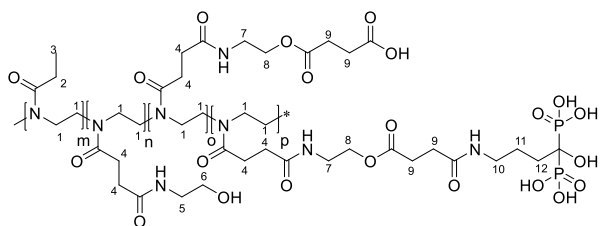

According to the general procedure described in the experimental section, the reaction of a solution of **P7d** (12 g, 0.74 mmol), sodium alendronate trihydrate (8.69 g, 6.74 mmol), *N*-hydroxysuccinimide (1.54 g, 13.37 mmol) and *N*-(3-dimethylaminopropyl)-*N'*-ethylcarbodiimide hydrochloride (2.56 g, 13.37 mmol) in PBS (108 mL, 0.5 M) afforded the desired polymer **P7e** (4.15 g, 0.23 mmol). <sup>1</sup>H NMR [400 MHz, δ (ppm), D<sub>2</sub>O]: 4.30–4.10 (br, 4 H, 8-CH<sub>2</sub>), 3.80–3.40 (br, 22 H, 1-CH<sub>2</sub> + 6-CH<sub>2</sub> + 7-CH<sub>2</sub>), 3.40–3.30 (br, 2 H, 5-CH<sub>2</sub>), 3.30–3.20 (br, 2 H, 10-CH<sub>2</sub>), 2.75–2.15 (br, 22 H, 2-CH<sub>2</sub> + 4-CH<sub>2</sub> + 9-CH<sub>2</sub>), 2.05–1.75 (br, 4 H, 11-CH<sub>2</sub> + 12-CH<sub>2</sub>), 1.15–0.95 (br, 3 H, 3-CH<sub>3</sub>). <sup>31</sup>P NMR [400 MHz, δ (ppm), D<sub>2</sub>O]: 18.25. Experimentally determined comonomer ratio: *m/n/o/p* 70:12:2:16. MALDI-TOF MS: *M*<sub>n</sub> 14.6 kDa. Yield: 30%.

### P(PropOx<sub>70</sub>-OH<sub>20</sub>-Ale<sub>10</sub>) P8e

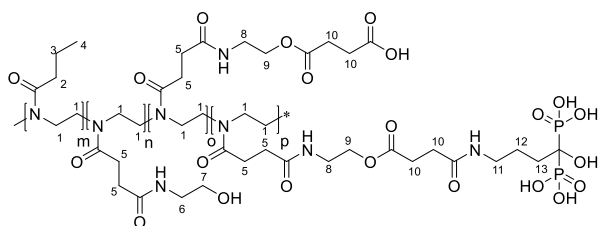

According to the general procedure described in the experimental section, the reaction of a solution of **P8d** (7.0 g, 0.45 mmol), sodium alendronate trihydrate (2.93 g, 9.00 mmol), *N*-hydroxysuccinimide (0.52 g, 4.50 mmol) and *N*-(3-dimethylaminopropyl)-*N'*-ethylcarbodiimide hydrochloride (0.86 g, 4.50 mmol) in PBS (37 mL, 0.5 M) afforded the desired polymer **P8e** (2.71 g, 0.16 mmol). <sup>1</sup>H NMR [400 MHz, δ (ppm), D<sub>2</sub>O]: 4.30–4.10 (br, 4 H, 9-CH<sub>2</sub>), 3.80–3.40 (br, 22 H, 1-CH<sub>2</sub> + 7-CH<sub>2</sub> + 8-CH<sub>2</sub>), 3.40–3.30 (br, 2 H, 6-CH<sub>2</sub>), 3.30–3.20 (br, 2 H, 11-CH<sub>2</sub>), 2.75–2.15 (br, 22 H, 2-CH<sub>2</sub> + 5-CH<sub>2</sub> + 10-CH<sub>2</sub>), 2.05–1.75 (br, 4 H, 12-CH<sub>2</sub> + 13-CH<sub>2</sub>), 1.65–1.45 (br, 2 H, 3-CH<sub>2</sub>), 1.15–0.85 (br, 3 H, 4-CH<sub>3</sub>). <sup>31</sup>P NMR [400

MHz,  $\delta$  (ppm), D<sub>2</sub>O]: 18.20. Experimentally determined comonomer ratio: *m/n/o/p* 70:20:1:9.

**MALDI-TOF MS:**  $M_n$  12.5 kDa. **Yield:** 36%.

### **P(PropOx<sub>70</sub>-OH<sub>10</sub>-Ale<sub>20</sub>) P9e**

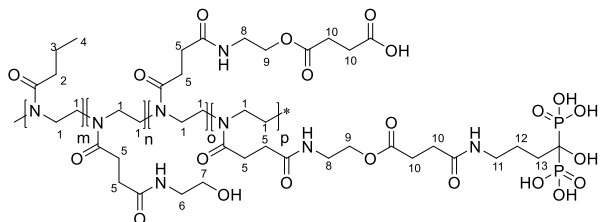

According to the general procedure described in the experimental section, the reaction of a solution of **P9d** (12.5 g, 0.62 mmol), sodium alendronate trihydrate (12.05 g, 37.07 mmol),

*N*-hydroxysuccinimide (2.13 g, 18.54 mmol) and *N*-(3-dimethylaminopropyl)-*N'*-ethylcarbodiimide hydrochloride (3.55 g, 18.54 mmol) in PBS (150 mL, 0.5 M) afforded the desired polymer **P9e** (4.82 g, 0.22 mmol). **<sup>1</sup>H NMR** [400 MHz,  $\delta$  (ppm), D<sub>2</sub>O]: 4.25–4.10 (br, 4 H, 9-CH<sub>2</sub>), 3.80–3.40 (br, 22 H, 1-CH<sub>2</sub> + 7-CH<sub>2</sub> + 8-CH<sub>2</sub>), 3.35–3.30 (br, 2 H, 6-CH<sub>2</sub>), 3.25–3.15 (br, 2 H, 11-CH<sub>2</sub>), 2.75–2.20 (br, 22 H, 2-CH<sub>2</sub> + 5-CH<sub>2</sub> + 10-CH<sub>2</sub>), 2.05–1.75 (br, 4 H, 12-CH<sub>2</sub> + 13-CH<sub>2</sub>), 1.65–1.45 (br, 2 H, 3-CH<sub>2</sub>), 1.00–0.85 (br, 3 H, 4-CH<sub>3</sub>). **<sup>31</sup>P NMR** [400 MHz,  $\delta$  (ppm), D<sub>2</sub>O]: 18.12. Experimentally determined comonomer ratio: *m/n/o/p* 70:10:3:17. **MALDI-TOF MS:**  $M_n$  17.9 kDa. **Yield:** 35%.

### **P(EtOx<sub>70</sub>-COOH<sub>20</sub>-Ale<sub>10</sub>) P10e**

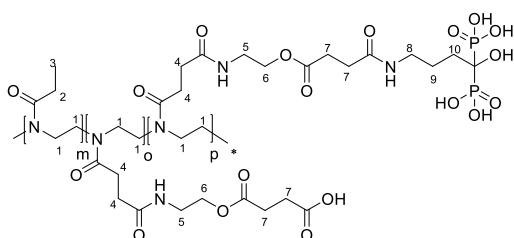

According to the general procedure described in the experimental section, the reaction of a solution of **P3d** (15 g, 0.81 mmol), sodium alendronate trihydrate (10.54 g, 32.41 mmol),

*N*-hydroxysuccinimide (1.86 g, 16.20 mmol) and *N*-(3-dimethylaminopropyl)-*N'*-ethylcarbodiimide hydrochloride (1.86 g, 16.20 mmol) in PBS (131 mL, 0.5 M) afforded the desired polymer **P10e** (5.22 g, 0.28 mmol). **<sup>1</sup>H NMR** [400 MHz,  $\delta$  (ppm), D<sub>2</sub>O]: 4.30–4.10 (br, 4 H, 6-CH<sub>2</sub>), 3.80–3.40 (br, 16 H, 1-CH<sub>2</sub> + 5-CH<sub>2</sub>), 3.30–3.20 (br, 2 H, 8-CH<sub>2</sub>), 2.75–2.15 (br, 18 H, 2-CH<sub>2</sub> + 4-CH<sub>2</sub> + 7-CH<sub>2</sub>), 2.05–1.75 (br, 4 H, 9-CH<sub>2</sub> + 10-CH<sub>2</sub>), 1.15–0.95 (br, 3 H, 3-

$\text{CH}_3$ ).  $^{31}\text{P}$  NMR [400 MHz,  $\delta$  (ppm),  $\text{D}_2\text{O}$ ]: 18.18. Experimentally determined comonomer ratio: *m/o/p* 70:17:13. MALDI-TOF MS:  $M_n$  16.3 kDa. Yield: 34%.

### P(EtOx<sub>70</sub>-COOH<sub>10</sub>-Ale<sub>20</sub>) P11e

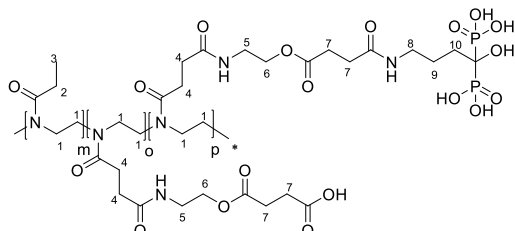

According to the general procedure described in the experimental section, the reaction of a solution of **P3d** (15 g, 0.81 mmol), sodium alendronate trihydrate (10.54 g, 32.41 mmol), *N*-hydroxysuccinimide (1.86 g, 16.2 mmol) and *N*-(3-dimethylaminopropyl)-*N*'-ethylcarbodiimide hydrochloride (3.11 g, 16.20 mmol) in PBS (131 mL, 0.5 M) afforded the desired polymer **P11e** (4.99 g, 0.24 mmol).  $^1\text{H}$  NMR [400 MHz,  $\delta$  (ppm),  $\text{D}_2\text{O}$ ]: 4.25–4.10 (br, 4 H, 6- $\text{CH}_2$ ), 3.80–3.40 (br, 16 H, 1- $\text{CH}_2$  + 5- $\text{CH}_2$ ), 3.25–3.15 (br, 2 H, 8- $\text{CH}_2$ ), 2.75–2.15 (br, 18 H, 2- $\text{CH}_2$  + 4- $\text{CH}_2$  + 7- $\text{CH}_2$ ), 2.05–1.70 (br, 4 H, 9- $\text{CH}_2$  + 10- $\text{CH}_2$ ), 1.15–0.95 (br, 3 H, 3- $\text{CH}_3$ ).  $^{31}\text{P}$  NMR [400 MHz,  $\delta$  (ppm),  $\text{D}_2\text{O}$ ]: 18.25. Experimentally determined comonomer ratio: *m/o/p* 70:10:20. MALDI-TOF MS:  $M_n$  16.3 kDa. Yield: 30%.

### P(PropOx<sub>70</sub>-COOH<sub>20</sub>-Ale<sub>10</sub>) P12e

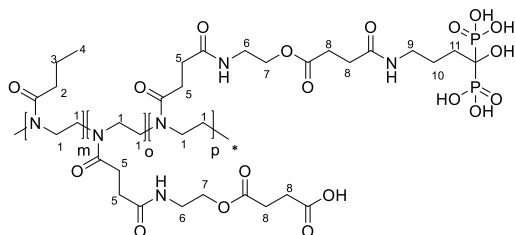

According to the general procedure described in the experimental section, the reaction of a solution of **P5d** (5.0 g, 0.26 mmol), sodium alendronate trihydrate (1.67 g, 5.13 mmol), *N*-hydroxysuccinimide (0.30 g, 2.56 mmol) and *N*-(3-dimethylaminopropyl)-*N*'-ethylcarbodiimide hydrochloride (0.49 g, 2.56 mmol) in PBS (21 mL, 0.5 M) afforded the desired polymer **P12e** (2.17 g, 0.12 mmol).  $^1\text{H}$  NMR [400 MHz,  $\delta$  (ppm),  $\text{D}_2\text{O}$ ]: 4.30–4.15 (br, 4 H, 7- $\text{CH}_2$ ), 3.80–3.30 (br, 16 H, 1- $\text{CH}_2$  + 6- $\text{CH}_2$ ), 3.30–3.20 (br, 2 H, 9- $\text{CH}_2$ ), 2.75–2.15 (br, 18 H, 2- $\text{CH}_2$  + 5- $\text{CH}_2$  + 8- $\text{CH}_2$ ), 2.05–1.75 (br, 4 H, 10- $\text{CH}_2$  + 11- $\text{CH}_2$ ), 1.65–1.45 (br, 2 H, 3-

$\text{CH}_3$ ), 1.15–0.95 (br, 3 H, 4- $\text{CH}_3$ ).  $^{31}\text{P}$  NMR [400 MHz,  $\delta$  (ppm),  $\text{D}_2\text{O}$ ]: 18.00. Experimentally determined comonomer ratio:  $m/o/p$  70:22:8. **MALDI-TOF MS**:  $M_n$  14.8 kDa. **Yield**: 46%.

### **P(PropOx<sub>70</sub>-COOH<sub>10</sub>-Ale<sub>20</sub>) P13e**

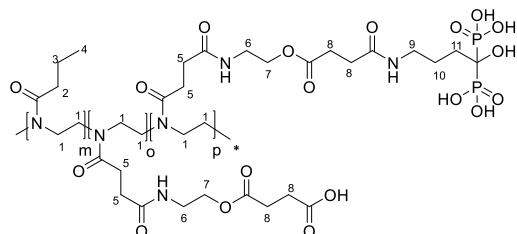

According to the general procedure described in the experimental section, the reaction of a solution of **P5d** (15 g, 0.77 mmol), sodium alendronate trihydrate (30.77 g, 10.01 mmol), *N*-hydroxysuccinimide (1.77 g, 15.39 mmol) and *N*-(3-dimethylaminopropyl)-*N'*-ethylcarbodiimide hydrochloride (2.95 g, 15.39 mmol) in PBS (125 mL, 0.5 M) afforded the desired polymer **P13e** (4.33 g, 0.20 mmol).  $^1\text{H}$  NMR [400 MHz,  $\delta$  (ppm),  $\text{D}_2\text{O}$ ]: 44.30–4.15 (br, 4 H, 7- $\text{CH}_2$ ), 3.80–3.30 (br, 16 H, 1- $\text{CH}_2$  + 6- $\text{CH}_2$ ), 3.30–3.20 (br, 2 H, 9- $\text{CH}_2$ ), 2.75–2.15 (br, 18 H, 2- $\text{CH}_2$  + 5- $\text{CH}_2$  + 8- $\text{CH}_2$ ), 2.05–1.75 (br, 4 H, 10- $\text{CH}_2$  + 11- $\text{CH}_2$ ), 1.65–1.45 (br, 2 H, 3- $\text{CH}_3$ ), 1.05–0.80 (br, 3 H, 4- $\text{CH}_3$ ).  $^{31}\text{P}$  NMR [400 MHz,  $\delta$  (ppm),  $\text{D}_2\text{O}$ ]: 18.21. Experimentally determined comonomer ratio:  $m/o/p$  70:10:20. **MALDI-TOF MS**:  $M_n$  17.0 kDa. **Yield**: 26%.

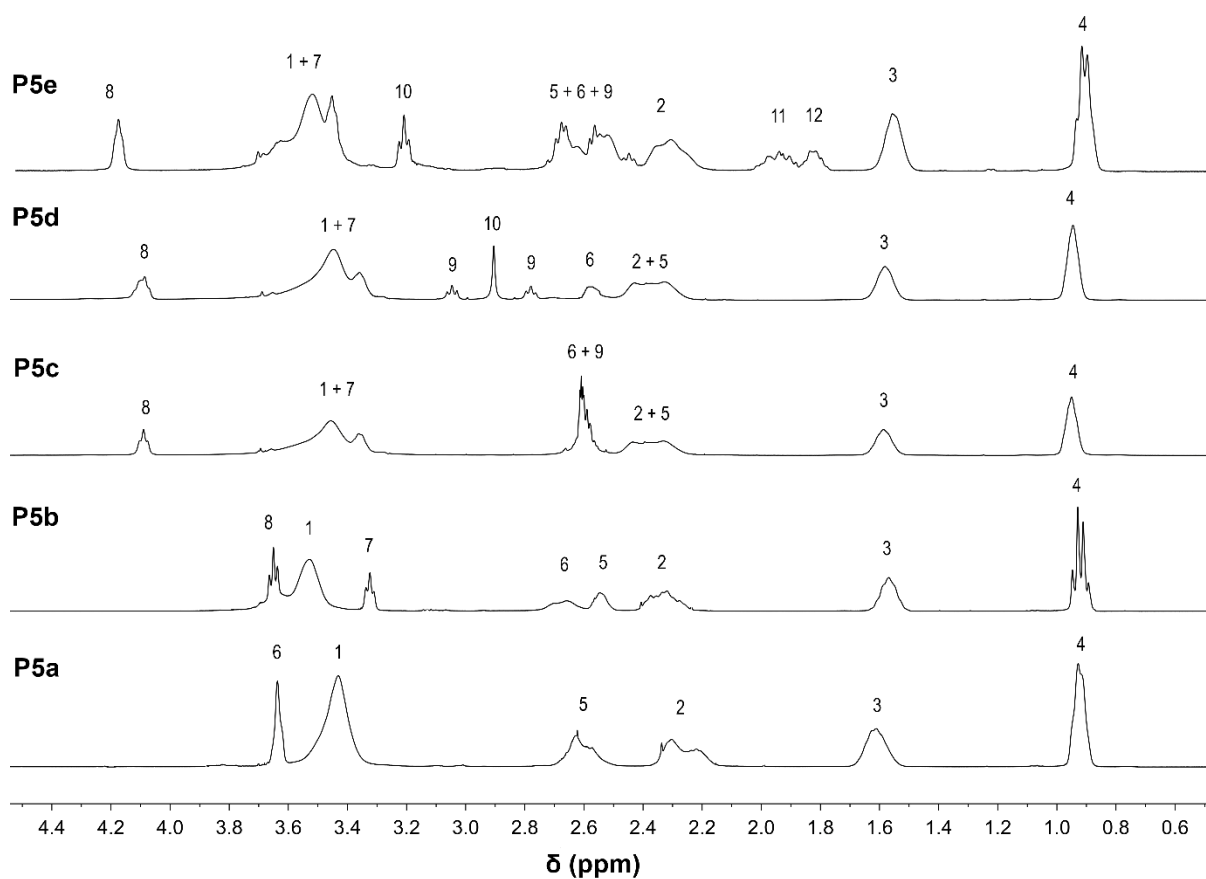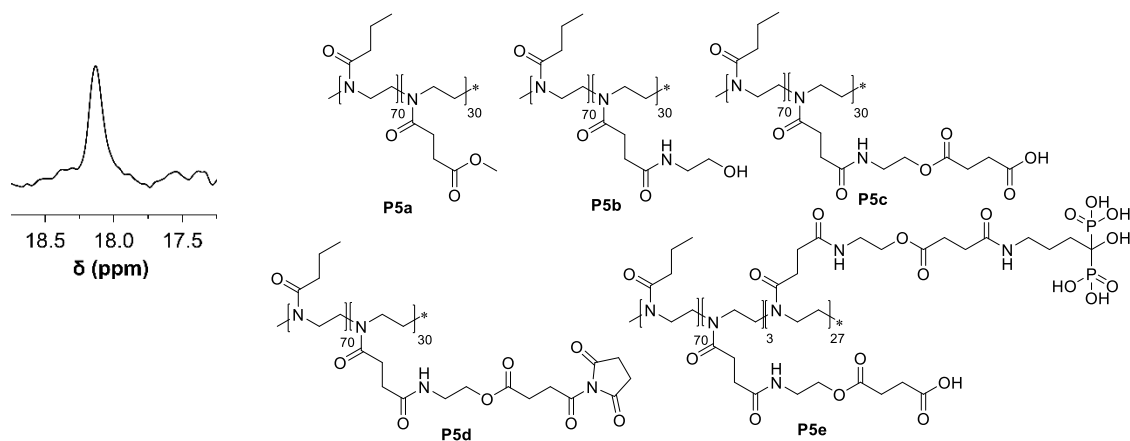

**Figure S1.**  $^1\text{H}$  NMR spectra of  $\text{P}(\text{PropOx}_{70}\text{-MestOx}_{30})$  **P5a**,  $\text{P}(\text{PropOx}_{70}\text{-OH}_{30})$  **P5b**,  $(\text{PropOx}_{70}\text{-COOH}_{30})$  **P5c**,  $\text{P}(\text{PropOx}_{70}\text{-NHS}_{30})$  **P5d**, and  $\text{P}(\text{PropOx}_{70}\text{-Ale}_{30})$  **P5e** and  $^{31}\text{P}$  NMR spectrum of  $\text{P}(\text{PropOx}_{70}\text{-Ale}_{30})$  (bottom).

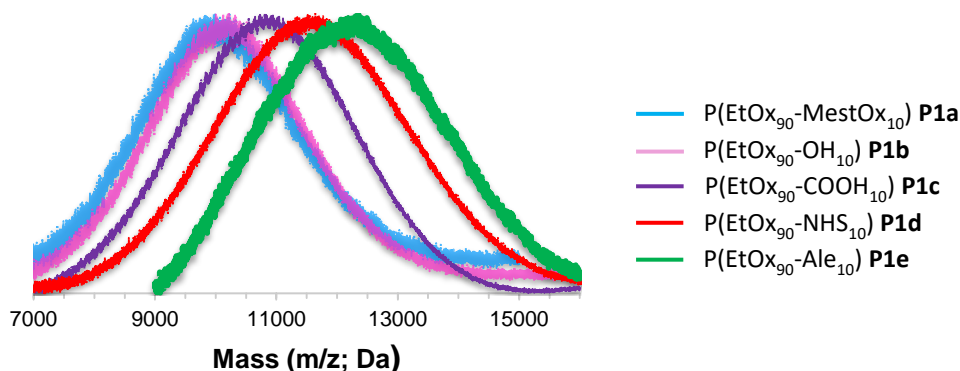

**Figure S2.** Overlay of normalized MALDI-TOF MS  $M_n$  spectra.

**Table S1.** Thermodynamic Parameters, i.e., Binding Constant  $K_{Ca^{2+}}$ , Stoichiometry  $N$  between  $Ca^{2+}$  and Polymer, Enthalpy  $\Delta H$  and Entropy  $\Delta S$  of the Interaction between POx-Ale and  $Ca^{2+}$  as Quantified Using ITC ( $n = 3$ ).

| Polymer     | Stoichiometry, $N$                                              | $K_{Ca^{2+}}$ ( $M^{-1}$ )            | $\Delta H$ ( $cal\ mol^{-1}$ )         | $\Delta S$ ( $cal\ deg^{-1}\ mol^{-1}$ ) |                |
|-------------|-----------------------------------------------------------------|---------------------------------------|----------------------------------------|------------------------------------------|----------------|
| Alendronate | $0.5 \pm 0.0$                                                   | $7.8 \times 10^3 \pm 1.8 \times 10^3$ | $1.3 \times 10^3 \pm 8.5 \times 10^2$  | $22.4 \pm 2.3$                           |                |
| <b>P1e</b>  | P(EtOx <sub>90</sub> -Ale <sub>10</sub> )                       | $6.3 \pm 0.1$                         | $1.2 \times 10^4 \pm 1.8 \times 10^3$  | $2.5 \times 10^3 \pm 1.5 \times 10^2$    | $27.1 \pm 0.3$ |
| <b>P2e</b>  | P(EtOx <sub>80</sub> -Ale <sub>20</sub> )                       | $14.3 \pm 1.4$                        | $9.1 \times 10^4 \pm 3.9 \times 10^3$  | $1.2 \times 10^3 \pm 1.3 \times 10^2$    | $26.9 \pm 0.4$ |
| <b>P3e</b>  | P(EtOx <sub>70</sub> -Ale <sub>30</sub> )                       | $25.6 \pm 2.4$                        | $2.4 \times 10^5 \pm 4.0 \times 10^3$  | $1.5 \times 10^3 \pm 2.4 \times 10^2$    | $29.6 \pm 0.8$ |
| <b>P6e</b>  | P(EtOx <sub>70</sub> -OH <sub>20</sub> -Ale <sub>10</sub> )     | $6.1 \pm 0.4$                         | $1.8 \times 10^4 \pm 6.7 \times 10^2$  | $1.9 \times 10^3 \pm 1.0 \times 10^2$    | $25.9 \pm 0.3$ |
| <b>P7e</b>  | P(EtOx <sub>70</sub> -OH <sub>10</sub> -Ale <sub>20</sub> )     | $15.1 \pm 0.2$                        | $1.2 \times 10^5 \pm 3.6 \times 10^3$  | $1.1 \times 10^3 \pm 2.7 \times 10^2$    | $27.1 \pm 0.9$ |
| <b>P10e</b> | P(EtOx <sub>70</sub> -COOH <sub>20</sub> -Ale <sub>10</sub> )   | $12.3 \pm 0.9$                        | $6.7 \times 10^4 \pm 2.7 \times 10^3$  | $1.8 \times 10^3 \pm 2.3 \times 10^2$    | $28.0 \pm 0.7$ |
| <b>P11e</b> | P(EtOx <sub>70</sub> -COOH <sub>10</sub> -Ale <sub>20</sub> )   | $18.7 \pm 1.1$                        | $1.6 \times 10^5 \pm 5.7 \times 10^3$  | $1.8 \times 10^3 \pm 8.6 \times 10^1$    | $29.5 \pm 0.3$ |
| <b>P4e</b>  | P(PropOx <sub>90</sub> -Ale <sub>10</sub> )                     | $7.9 \pm 0.4$                         | $3.5 \times 10^4 \pm 2.3 \times 10^3$  | $2.2 \times 10^3 \pm 3.2 \times 10^2$    | $28.0 \pm 0.9$ |
| <b>P5e</b>  | P(PropOx <sub>70</sub> -Ale <sub>30</sub> )                     | $24.2 \pm 1.0$                        | $1.6 \times 10^5 \pm 1.0 \times 10^4$  | $2.0 \times 10^3 \pm 9.3 \times 10^1$    | $30.6 \pm 0.2$ |
| <b>P8e</b>  | P(PropOx <sub>70</sub> -OH <sub>20</sub> -Ale <sub>10</sub> )   | $8.2 \pm 0.5$                         | $4.2 \times 10^4 \pm 8.7 \times 10^3$  | $2.1 \times 10^3 \pm 1.1 \times 10^2$    | $27.0 \pm 0.4$ |
| <b>P9e</b>  | P(PropOx <sub>70</sub> -OH <sub>10</sub> -Ale <sub>20</sub> )   | $13.8 \pm 1.6$                        | $1.1 \times 10^5 \pm 1.8 \times 10^4$  | $2.2 \times 10^3 \pm 2.9 \times 10^2$    | $29.9 \pm 0.9$ |
| <b>P12e</b> | P(PropOx <sub>70</sub> -COOH <sub>20</sub> -Ale <sub>10</sub> ) | $9.9 \pm 0.7$                         | $2.2 \times 10^4 \pm 1.7 \times 10^3$  | $2.1 \times 10^3 \pm 3.3 \times 10^2$    | $27.8 \pm 1.0$ |
| <b>P13e</b> | P(PropOx <sub>70</sub> -COOH <sub>10</sub> -Ale <sub>20</sub> ) | $17.6 \pm 0.1$                        | $10.0 \times 10^5 \pm 3.3 \times 10^3$ | $2.2 \times 10^3 \pm 1.9 \times 10^2$    | $30.4 \pm 0.4$ |

**Table S2.** Visual Screening of Gelation at Different Polymer and Calcium Concentrations.

|             |                                                               |               | [Ca <sup>2+</sup> ] (mM) |      |      |   |
|-------------|---------------------------------------------------------------|---------------|--------------------------|------|------|---|
| Polymer     | [POx]<br>(wt %)                                               | [Ale]<br>(mM) | 90                       | 1800 | 3600 |   |
| <b>P1e</b>  | P(EtOx <sub>90</sub> -Ale <sub>10</sub> )                     | 10            | 73                       | X    | X    | X |
|             |                                                               | 20            | 146                      | X    | X    | X |
|             |                                                               | 30            | 219                      | ●    | ●    | ● |
| <b>P2e</b>  | P(EtOx <sub>80</sub> -Ale <sub>20</sub> )                     | 10            | 134                      | X    | X    | X |
|             |                                                               | 20            | 268                      | X    | X    | X |
|             |                                                               | 30            | 402                      | X    | ●    | ● |
| <b>P3e</b>  | P(EtOx <sub>70</sub> -Ale <sub>30</sub> )                     | 10            | 154                      | X    | △    | △ |
|             |                                                               | 20            | 308                      | X    | △    | △ |
|             |                                                               | 30            | 462                      | X    | ●    | ● |
| <b>P6e</b>  | P(EtOx <sub>70</sub> -OH <sub>20</sub> -Ale <sub>10</sub> )   | 10            | 63                       | X    | X    | X |
|             |                                                               | 20            | 126                      | X    | X    | X |
|             |                                                               | 30            | 189                      | X    | ●    | ● |
| <b>P7e</b>  | P(EtOx <sub>70</sub> -OH <sub>10</sub> -Ale <sub>20</sub> )   | 10            | 127                      | △    | △    | △ |
|             |                                                               | 20            | 254                      | ●    | ●    | ✓ |
|             |                                                               | 30            | 381                      | ✓    | ✓    | ✓ |
| <b>P10e</b> | P(EtOx <sub>70</sub> -COOH <sub>20</sub> -Ale <sub>10</sub> ) | 10            | 80                       | X    | X    | X |
|             |                                                               | 20            | 160                      | X    | X    | X |
|             |                                                               | 30            | 240                      | ●    | ●    | ● |
| <b>P11e</b> | P(EtOx <sub>70</sub> -COOH <sub>10</sub> -Ale <sub>20</sub> ) | 10            | 127                      | X    | △    | △ |
|             |                                                               | 20            | 254                      | X    | △    | △ |
|             |                                                               | 30            | 381                      | X    | ●    | ● |

Legend: X solution; ● viscous solution; ✓ transparent gel; △ white gel. The physical appearance of transparent (P(EtOx<sub>70</sub>-OH<sub>10</sub>-Ale<sub>20</sub>)) and white gels (P(EtOx<sub>70</sub>-Ale<sub>30</sub>) and P(EtOx<sub>70</sub>-COOH<sub>10</sub>-Ale<sub>20</sub>)) is shown in Figure S4.

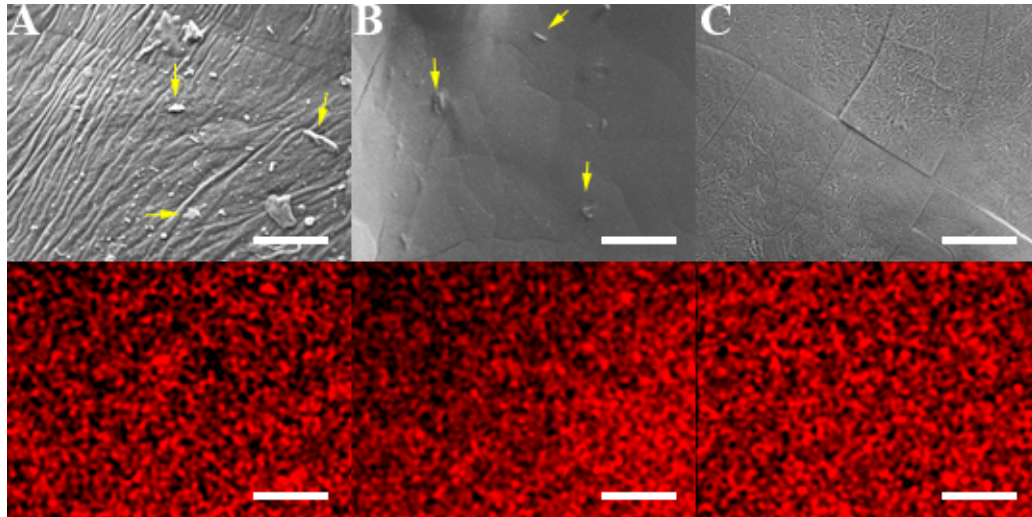

**Figure S3.** Scanning electron micrographs with elemental mapping for calcium of lyophilized gels containing 30 wt % of: (A) P(EtOx<sub>70</sub>-Ale<sub>30</sub>), (B) P(EtOx<sub>70</sub>-COOH<sub>10</sub>-Ale<sub>20</sub>), and (C) P(EtOx<sub>70</sub>-OH<sub>10</sub>-Ale<sub>20</sub>) and 20 wt % of CaCl<sub>2</sub>. Scale bars correspond to 50  $\mu$ m. In (A) and (B), yellow arrows indicate localization of precipitates.

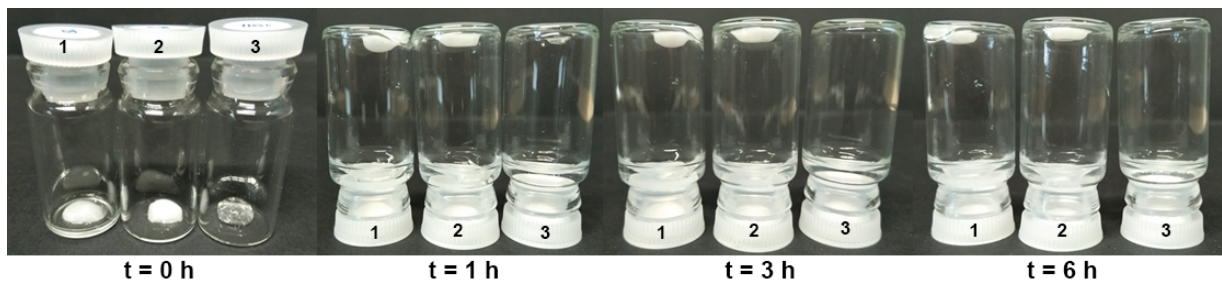

**Figure S4.** In vitro stability of hydrogels: **1** P(EtOx<sub>70</sub>-Ale<sub>30</sub>), **2** P(EtOx<sub>70</sub>-COOH<sub>10</sub>-Ale<sub>20</sub>) and **3** P(EtOx<sub>70</sub>-OH<sub>10</sub>-Ale<sub>20</sub>) in 100 mM EDTA. Stable hydrogels were stuck to the bottom of the glass vials for all polymers except for polymer **3** P(EtOx<sub>70</sub>-OH<sub>10</sub>-Ale<sub>20</sub>) which disintegrated completely after 3 h of immersion in 100 mM EDTA.
